# Supplementary material for: Crystal structure, mutational analysis and RNA-dependent ATPase activity of the yeast DEAD-box pre-mRNA splicing factor Prp28
Source: PubMed Central journal article supplement (PMC4227776; doi:10.1093/nar/gku930), 2014-10-10
Supplement: supp_gku930_nar-02362-m-2014-File010.pdf [file supp_gku930_nar-02362-m-2014-File010.pdf]

Supplemental Material

**Crystal structure, mutational analysis, and RNA-dependent ATPase activity of the yeast DEAD-box pre-mRNA splicing factor Prp28**

Agata Jacewicz, Beate Schwer, Paul Smith, and Stewart Shuman

Tables S1, S2 and S3

Figures S1 and S2

Table S1

## Prp28 crystallographic data and refinement statistics

| <b>Diffraction data</b>                              |                                                                                              |
|------------------------------------------------------|----------------------------------------------------------------------------------------------|
| Space group                                          | <i>P3<sub>2</sub>21</i>                                                                      |
| Cell dimensions                                      |                                                                                              |
| <i>a</i> , <i>b</i> , <i>c</i> (Å)                   | 114.72, 114.72, 156.19                                                                       |
| $\alpha$ , $\beta$ , $\gamma$ (°)                    | 90.00, 90.00, 120.00                                                                         |
| Number of crystals                                   | 3                                                                                            |
| Wavelength (Å)                                       | 0.9792                                                                                       |
| Resolution (Å)                                       | 57.00 – 2.54 (2.68 – 2.54)                                                                   |
| $R_{\text{sym}}$ <sup>a</sup>                        | 0.066 (0.253) [60.00 – 2.55]<br>0.064 (0.293) [65.00 – 2.54]<br>0.058 (0.239) [63.00 – 2.54] |
| $R_{\text{cryst}}$ <sup>a</sup>                      | 0.038 (0.159)                                                                                |
| Unique reflections <sup>b</sup>                      | 39724                                                                                        |
| <i>I</i> / $\sigma$ <i>I</i>                         | 16.7 (5.0)                                                                                   |
| Completeness (%)                                     | 99.8 (99.4)                                                                                  |
| Multiplicity                                         | 20.5 (19.4)                                                                                  |
| <b>Phasing</b>                                       |                                                                                              |
| Phasing method                                       | Se-SAD (24 Se sites)                                                                         |
| Resolution (Å)                                       | 53.85-3.30                                                                                   |
| Figure of merit <sup>c</sup>                         | 0.476                                                                                        |
| Signal to noise <sup>d</sup>                         | Ano=0.135                                                                                    |
| <b>Refinement statistics</b> ( <i>F</i> > 0)         |                                                                                              |
| Resolution (Å)                                       | 53.84 – 2.54 (2.61 – 2.54)                                                                   |
| Completeness                                         | 99.9 (99.0)                                                                                  |
| $R_{\text{work}}$ / $R_{\text{free}}$ <sup>e</sup>   | 16.6 / 21.9 (19.9 / 27.5)                                                                    |
| <i>B</i> -factors (Å <sup>2</sup> ) Overall / Wilson | 33.6 / 33.0                                                                                  |
| RMS deviations                                       |                                                                                              |
| Bond lengths (Å)                                     | 0.009                                                                                        |
| Bond angles (°)                                      | 1.214                                                                                        |
| Ramachandran plot                                    |                                                                                              |
| Favored (%)                                          | 98.1                                                                                         |
| Outliers (%)                                         | 0                                                                                            |
| <b>Model contents</b>                                |                                                                                              |
| Protomers / ASU <sup>f</sup>                         | 2                                                                                            |
| Protein residues                                     | 903                                                                                          |
| Waters                                               | 249                                                                                          |
| Ligands/Ions                                         | 1 AMP-PNP, 2 Mg <sup>2+</sup> , 8 PEG, 1 glycerol                                            |
| <b>PDB ID</b>                                        |                                                                                              |
|                                                      | 4W7S                                                                                         |

a)  $R_{\text{sym}}$  and  $R_{\text{cryst}}$  are defined as  $R_{\text{pim}}$  and computed in SCALA from a single crystal and from all merged data, respectively. The figures within brackets reflect the resolution ranges for each individual crystal.

b) Friedel's pairs were treated separately

c) Signal to noise for anomalous phasing (Ano) is the fraction of the data for which  $D_{\text{ano}} > 3.0\sigma D_{\text{ano}}$  condition holds as calculated in Phenix.Xtriage.

d) Figure of merit (FOM) value is an output from Phaser (in Phenix.Autosol)

e)  $R_{\text{free}}$  set consists of 4.9% of data against which the structure was not refined

f) NCS restraints were not used during refinement.

Table S2

## Structural Homologs of Yeast Prp28 N-domain (aa 134-402)

| Protein                          | pdb ID | Z score | Root mean square deviation        |
|----------------------------------|--------|---------|-----------------------------------|
| Human Prp28                      | 4NHO   | 33.5    | 1.8 Å at 254 C $\alpha$ positions |
| Human DDX5                       | 3FE2   | 31.6    | 1.8 Å at 233 C $\alpha$ positions |
| Yeast Prp5                       | 4LK2   | 30.6    | 2.0 Å at 240 C $\alpha$ positions |
| Human DDX3X                      | 2I4I   | 29.6    | 1.9 Å at 225 C $\alpha$ positions |
| <i>Drosophila</i> Vasa           | 2DB3   | 28.3    | 2.0 Å at 228 C $\alpha$ positions |
| Human DDX52                      | 3DKP   | 27.9    | 2.2 Å at 229 C $\alpha$ positions |
| Yeast eIF4A                      | 1FUU   | 27.8    | 1.8 Å at 213 C $\alpha$ positions |
| <i>Thermus thermophilus</i> Hera | 4KBG   | 27.8    | 1.5 Å at 205 C $\alpha$ positions |
| <i>Bombyx mori</i> Vasa          | 4D26   | 27.5    | 2.3 Å at 231 C $\alpha$ positions |
| Human DDX47                      | 3BER   | 27.3    | 1.9 Å at 211 C $\alpha$ positions |
| Human eIF4A                      | 2G9N   | 27.3    | 1.9 Å at 213 C $\alpha$ positions |
| Human DDX53                      | 3IUY   | 27.2    | 1.6 Å at 205 C $\alpha$ positions |
| Human DDX18                      | 3LY5   | 27.0    | 1.7 Å at 208 C $\alpha$ positions |
| Human DDX6                       | 4CT4   | 26.8    | 1.9 Å at 209 C $\alpha$ positions |
| Human eIF4A-III                  | 4C9B   | 26.7    | 2.0 Å at 218 C $\alpha$ positions |
| Yeast Mss116                     | 3I5Y   | 25.8    | 2.4 Å at 225 C $\alpha$ positions |
| Human DBP5                       | 3FHC   | 25.8    | 2.3 Å at 217 C $\alpha$ positions |
| Yeast Dhh1                       | 1S2M   | 25.7    | 1.9 Å at 203 C $\alpha$ positions |
| Human DDX20                      | 3B7G   | 25.1    | 1.8 Å at 204 C $\alpha$ positions |

Table S3

## Structural Homologs of Yeast Prp28 C-domain (aa 403-583)

| Protein                          | pdb ID | Z score | Root mean square deviation        |
|----------------------------------|--------|---------|-----------------------------------|
| Human DDX41                      | 2P6N   | 23.4    | 1.5 Å at 158 C $\alpha$ positions |
| Human DDX3X                      | 2JGN   | 21.8    | 1.8 Å at 158 C $\alpha$ positions |
| <i>Drosophila</i> Vasa           | 2DB3   | 20.6    | 2.5 Å at 161 C $\alpha$ positions |
| Human Prp28                      | 4NHO   | 20.5    | 2.4 Å at 157 C $\alpha$ positions |
| <i>Bombyx mori</i> Vasa          | 4D25   | 20.4    | 2.5 Å at 161 C $\alpha$ positions |
| <i>Thermus thermophilus</i> Hera | 4KBG   | 20.4    | 2.6 Å at 156 C $\alpha$ positions |
| Yeast Dbp5                       | 3RRN   | 19.8    | 2.9 Å at 158 C $\alpha$ positions |
| <i>E. coli</i> SrmB              | 2YJT   | 19.7    | 2.2 Å at 157 C $\alpha$ positions |
| Human DDX6                       | 4CRW   | 19.5    | 2.2 Å at 150 C $\alpha$ positions |
| Human DBP5                       | 3FHT   | 18.7    | 2.7 Å at 156 C $\alpha$ positions |
| Yeast Prp5                       | 4LK2   | 18.4    | 2.6 Å at 166 C $\alpha$ positions |
| Human eIF4A-III                  | 2HYI   | 18.0    | 2.9 Å at 158 C $\alpha$ positions |
| Human UAP56                      | 1T5I   | 17.9    | 2.4 Å at 150 C $\alpha$ positions |
| Human DDX25                      | 2RB4   | 17.6    | 2.2 Å at 147 C $\alpha$ positions |
| Yeast eIF4A                      | 1FUK   | 17.3    | 2.6 Å at 145 C $\alpha$ positions |
| Yeast Dhh1                       | 1S2M   | 17.1    | 2.3 Å at 146 C $\alpha$ positions |

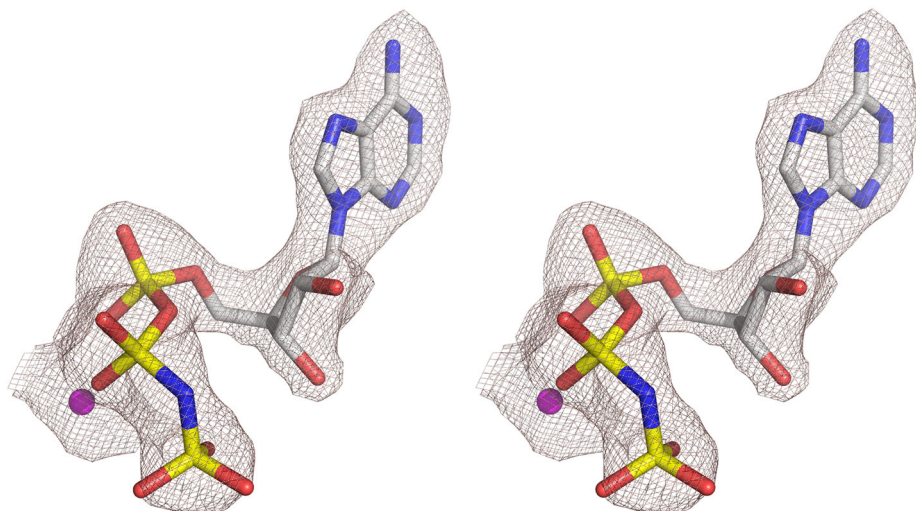

Figure S1. **Electron density for AMPPNP•Mg<sup>2+</sup>**. Stereo view of the Fo-Fc map (mesh) of the nucleotide in the active site of the B protomer, contoured at 2  $\sigma$ . The AMPPNP modeled into the density is shown as a stick model. Mg<sup>2+</sup> is depicted as a magenta sphere.

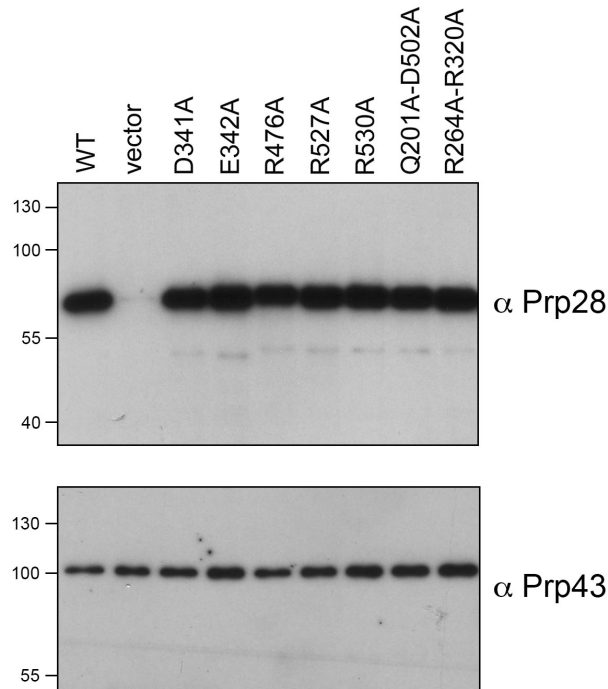

**Figure S2. Immunoblot analysis of steady-state levels of mutant Prp28 proteins.** Wild-type cells bearing 2 $\mu$  *HIS3* plasmids for expression of the indicated *PRP28* alleles under the control of a *GAL1* promoter, or an empty 2 $\mu$  *HIS3* vector control, were grown in glucose-containing medium at 30°C until the  $A_{600}$  reached  $\sim$ 0.6. Cells were washed with water, suspended in SD-His medium containing 2% galactose at an  $A_{600}$  of 0.6 and incubated for 4 h at 30°C. Aliquots (10  $A_{600}$  units) of the cells were collected by centrifugation and lysed in 20% trichloroacetic acid. Total acid-insoluble protein was recovered and resuspended in 1 M Tris-HCl (pH 8.0). Aliquots of the samples, adjusted to the same total protein content based on  $A_{280}$  of the extracts, were adjusted to 2% SDS and 0.1 M DTT and then analyzed by electrophoresis through 8% polyacrylamide gels containing 0.1% SDS. The gel contents were transferred to PVDF membranes and the membranes were probed by Western blotting with rabbit polyclonal antibodies against Prp28 or Prp43 as specified. Immune complexes were visualized using horseradish peroxidase-linked anti-rabbit IgG and an ECL Western detection system (Amersham Biosciences, GE Healthcare). The positions and sizes (kDa) of marker polypeptides are indicated on the *left*.
